# Supplementary material for: Sea Cucumber Polysaccharide from Stichopus japonicu and Its Photocatalytic Degradation Product Alleviate Acute Alcoholic Liver Injury in Mice
Source: MDPI journal article supplement (doi:10.3390/foods13060963), 2024-03-21
Supplement: s1 [file s1]

## Supplementary materials

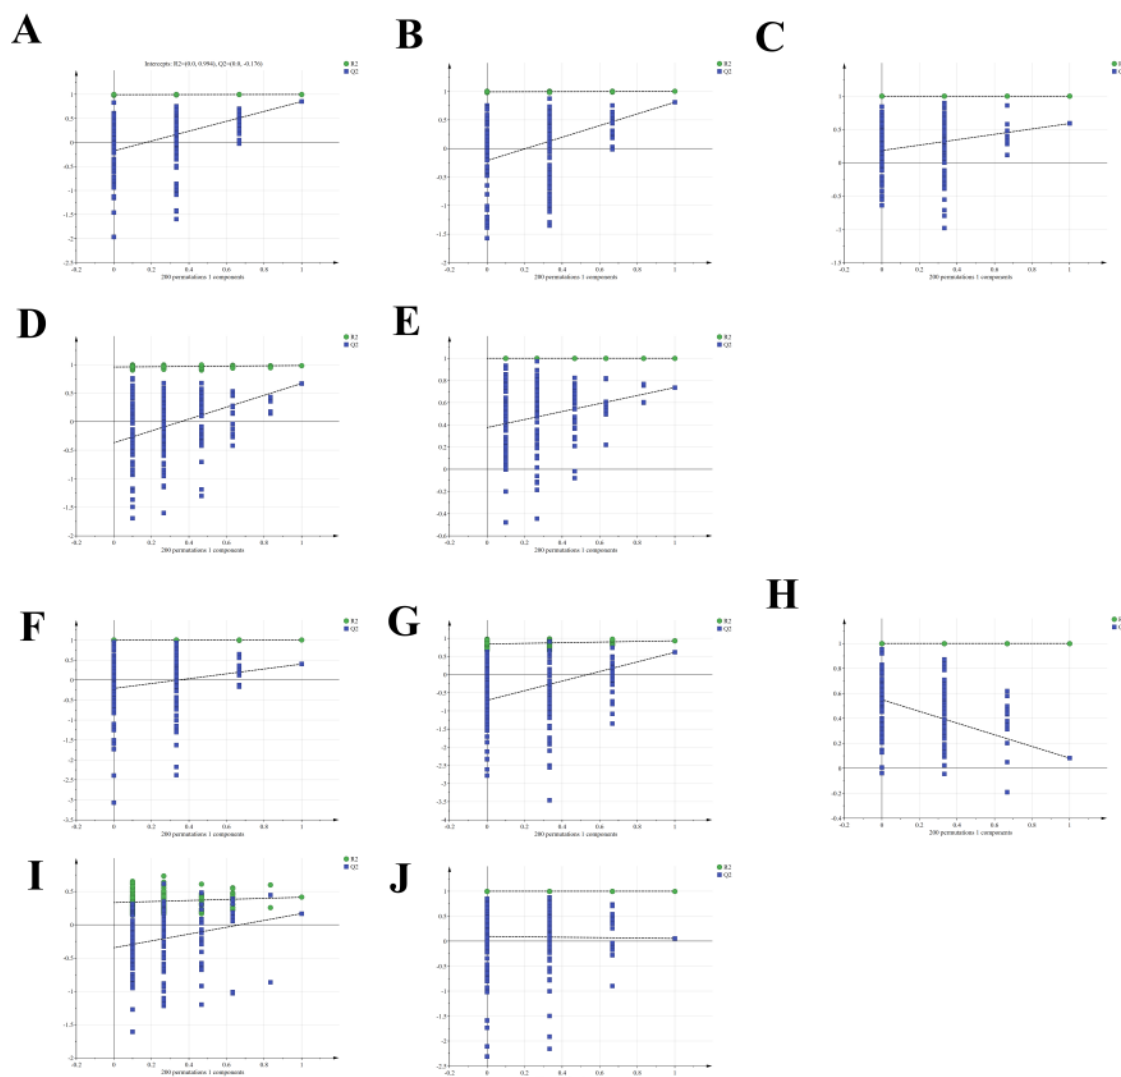

**Fig.S1** Permutation test of each group and control group under positive and negative ions (A-E: positive ion mode, G-K: negative ion mode), control group vs. model group (A,G), H-SCSP group vs. model group (B,H), H-dSCSP group vs. model group (C,I), L-SCSP group vs. model group (D,J), L-dSCSP group vs. model group (E,K).

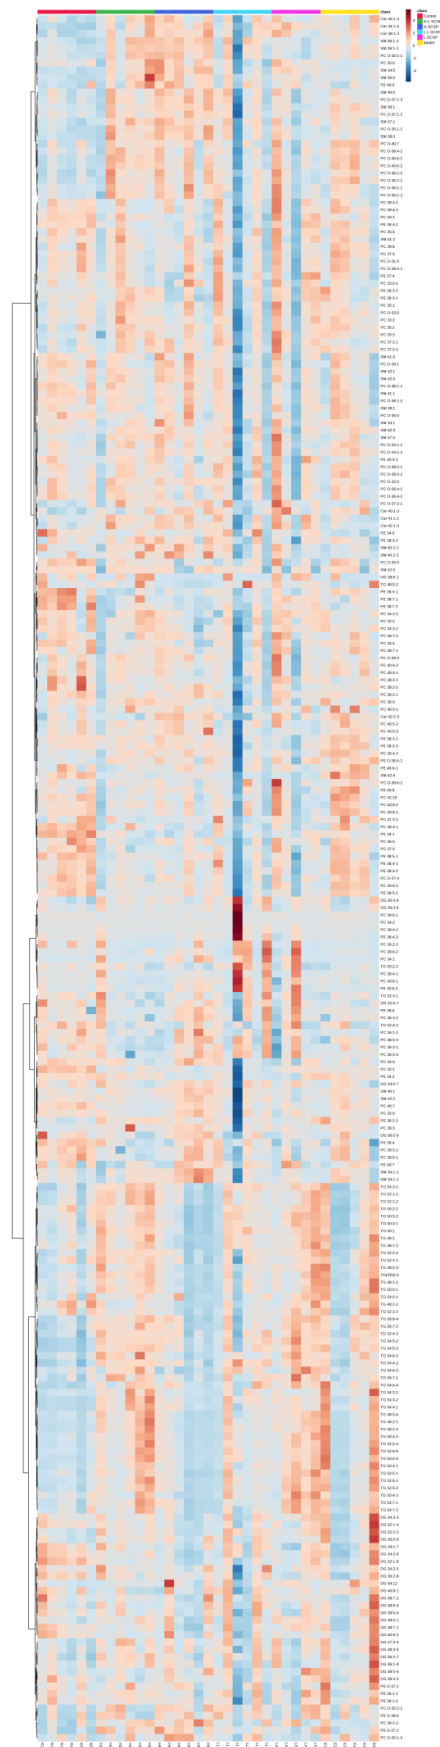

**Fig.S2** Heat map of lipid metabolites difference between each group and model group(VIP>1).
